# Supplementary material for: Integration of a guided-mode resonance filter with microposts for in-cell protein detection
Source: Royal Society of Chemistry journal article supplement (doi:10.1039/c6an00023a), 2016-01-01
Supplement: c6an00023a1.pdf [file c6an00023a1.pdf]

# **Supplementary Information for:**

## **Integration of a Guided-Mode Resonance Filter with Microposts for In-Cell Protein Detection**

**Yi-Kai Tu<sup>1</sup>, Meng-Zhe Tsai<sup>1</sup>, I-Chin Lee<sup>2</sup>, Hsin-Yun Hsu<sup>2</sup> and Cheng-Sheng Huang<sup>1,\*</sup>**

*<sup>1</sup>Department of Mechanical Engineering and <sup>2</sup>Department of Applied Chemistry, National Chiao Tung University,*

*1001 Ta Hsueh Rd., Hsinchu, Taiwan 30010*

*\*Corresponding author: email: [csh@nctu.edu.tw](mailto:csh@nctu.edu.tw)*

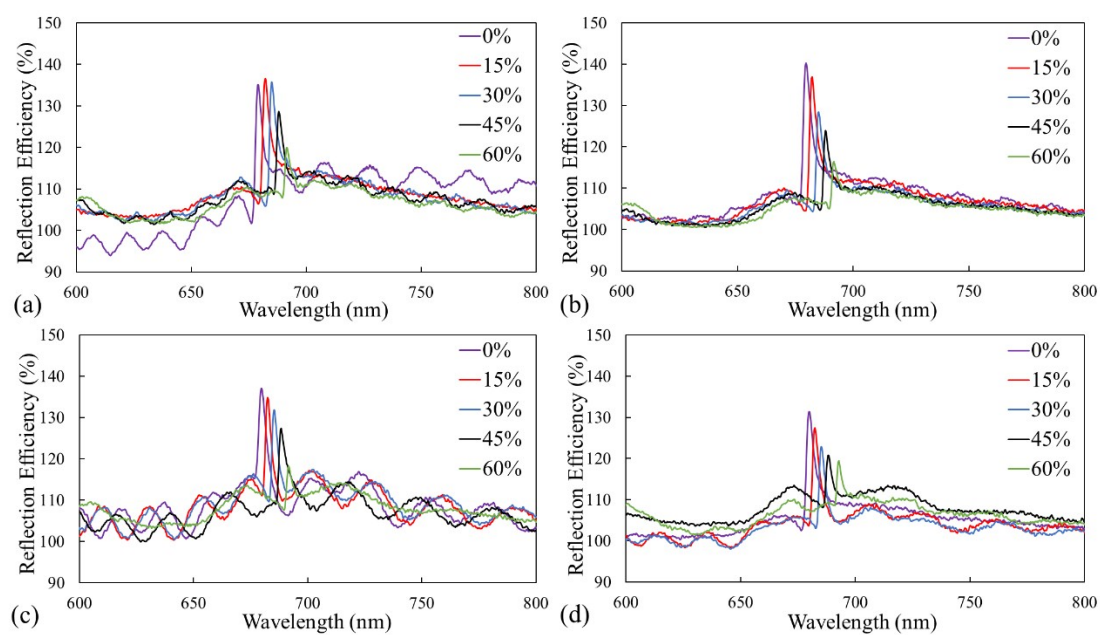

Figure S-1 The reflection spectra for five different concentrations of sucrose solution from four experimental runs.

Table S-1 The peak reflection wavelength for each concentration from five experimental runs

| RI    | Conc. | Run 1  | Run 2  | Run 3  | Run 4  | Run 5  | Average | STD   |
|-------|-------|--------|--------|--------|--------|--------|---------|-------|
| 1.333 | 0%    | 678.94 | 679.62 | 679.62 | 679.95 | 679.95 | 679.62  | 0.369 |
| 1.356 | 15%   | 682.31 | 682.31 | 682.31 | 682.31 | 682.31 | 682.31  | 0     |
| 1.381 | 30%   | 685.00 | 685.00 | 685.34 | 685.00 | 685.00 | 685.07  | 0.136 |
| 1.410 | 45%   | 688.03 | 688.03 | 688.36 | 688.03 | 688.03 | 688.10  | 0.132 |
| 1.442 | 60%   | 691.72 | 691.72 | 691.72 | 691.72 | 692.72 | 691.92  | 0.4   |
